# Supplementary material for: Bi-Functional Chicken Immunoglobulin-Like Receptors With a Single Extracellular Domain (ChIR-AB1): Potential Framework Genes Among a Relatively Stable Number of Genes Per Haplotype
Source: Front Immunol. 2019 Sep 18;10:2222. doi: 10.3389/fimmu.2019.02222 (PMC6760009; doi:10.3389/fimmu.2019.02222)
Supplement: Table S1 — Spreadsheet of peaks from RSCA using FLR29 for the 12 inbred lines. [file Table_1.XLSX]

## Sheet: old FLR29
Inbred lines peaks with old FLR29
	yellow: first cluster					t, tiny peaks		s, small peaks
	blue: second cluster
samples	P1	P2	P3	P4	P5	P6	P7	P8	P9	P10	P11	P12	P13	P14	P15	P16	P17	P18	P19	P20	P21	P22	P23	P24	P25	P26	P27	P28	P29	P30	P31	P32	P33	P34	P35	P36	P37
line 6 (all)	800	807	815-819 wide		824	830					863					1081	1093		1113 t		1130	1136 t			11175 or 1178			1221		1245	1254	1270 t	1282	1292 t	1312	1325
line 15 (all)	800	807-810	815	819	824	830			849	855	863				1070	1080			1112 t		1129	1136 t	1149					1220	1225 t				1287 t	1296 t	1312	1323
line 7 (all)	800	807 (missing in 2 samples)	813		824	829-832		842			865 (one sample drifted to 860 another to 868)	872 t (one sample drifted to 866)	879								1130		1149 s					1221		1243t				1294
line 0 first pattern (only sample 01-307)	804	809-811	816 s		823-826	830-833 s		842			864 s		876			1083					1124	1133 t				1203 t		1216 s		1233 t			1284	1299 t		1321 t
line 0 second pattern (samples 2 and 3-from 307)	804	809-811	816 s		823-826	830-833 s		842			864 s		876								1124	1133 t				1203 t		1216 s		1233 t			1284		1312 t
line N first pattern (samples N2,3,4,6)	800	806-809	814		819-824 wide	830-832 s		842			865 s	872 t	878						1113 t		1130		1149 t					1221		1245 t				1295 (sample N6 has another high voltage spike here)		sample N6 has 1322-1330 t
line N second pattern (samples N7,9)	800	808	814		822-824	830			850 t		864 s	872 t	878				1094 s		1112 t		1130 s		1149 t					1222						1294 s	1312 s	1330 t	1357 t
line N third pattern (samples N5,8,10)	800	807	814-817		821 s	831		837t-842 t			863	873 t	878			1081 s	1094 s		1113 t		1130 s				1177 t			1222 s		1245 t	1254 t	1270 t	1283 s	1293 s	1312 s	1324 s
line P first pattern (samples P1,3,5,7,9)	804	809-810 (but P5 has it tiny)	817		827 t (only for P1,3,9)	835 s		846	853		864 s								1107 s	1125 s			1146 s						1228 s
line P second pattern (samples P6,8,10)	800	807 t	813 s			830 s		847			862 s				1073 t				1106 s		1128 s				1173 s			1217 s
line P third pattern (sample P2)	802	805 t	813 s		820 t	829-831 s		842s-847			863 s		879		1074 t				1106		1129				1176 t			1217 s						1293 s
line W first pattern (samples W1,2,5,9,7)	800	807	815		824 t (s in W1)	829					862					1082	1094		1113 t		1130 s				1176 t			1222			1253 t	1270 t	1282 s		1312 s	1324 s
line W second pattern (samples W8,10,4)	801	807	816		820 s (W8 has 821-823 s)	830					864 s (W4 has 858-864 s)					1080 t	1092 t		1105 t		1130-1135 t				present but with background			1220 s			present but with background		1280 t		1309 t	1321 t
line W third pattern (sample W3)	800				820 wide	830										1088 t			1107 s			1138 t						1222 s		1246 t			1282 t	1294 t
line CB4 first pattern (samples 1,2 (307))	800	812	816 s		825 s	830	837				864 t									1124	1130					1200	1210	1215				1270 s	1282 t	1300 s
line CB4 second pattern (samples 3.307)	800	809-(811 t)	815-817 s		822- (826 t)	831 s	837							1061 s			1091 s	1100 s		1123 s	1130		1150 s	1168 s		1199	1208 s	1214				1271 s	1280 s	1300 s
line CB12 first pattern (samples(1,5,8,10)	800	810	814t (samples 1,10 only)		824	830	837				866s (sample 5 only)								1111 t		1130	1138						1219	1228 s	1245 s			1282 s	1296 t	1310
line CB12 second pattern (samples 4, 6)	800	805-809 t			820 s		837 s				862 s				1072 t				1106t-1113t		1130 t	1138 t						1220					1280 t	1294 t	1310 t	1324 t	1339 s only in sample 4
line CB12 third pattern (samples 2,3,7,9)	800	807 s- 811t	813 t		820	831 t	837		850 t		862				1072 s				1106-1113 s		1130 s	1140 s		1162 t		1190 t		1220	1230 t				1281 t		1311 s		1332 t
line C first pattern (samples 1,3,6	801	810			824 s	831	838														1132	1142						1226 s	1234 s	1250 s			1285 s		1314 s	1327 t (only sample 3)
line C second pattern (samples 7,8,9,10,11,12)	800	807-811 t	814t-816t	818 t	821	832 t	837		849 t		863				1073 s				1107 t	1119 t	1132 t	1141 s		1164 t		1191 t		1221 s	1234 t						1314 s
